# Supplementary material for: Molecular adduct of amantadine ferulate presents a pathway for slowingin vitro/vivoreleases and raising synergistic antiviral effectsviadual optimization salification strategy
Source: Royal Society of Chemistry journal article supplement (doi:10.1039/d1ce00382h), 2021-01-01
Supplement: d1ce00382h1.pdf [file d1ce00382h1.pdf]

## Supporting Information

### **Molecular adduct of amantadine ferulate presents a pathway for slowing *in vitro/vivo* releases and raising synergistic antiviral effects via dual optimization salification strategy**

Yuan-Yuan Niu<sup>‡a</sup>, Ling-Yang Wang<sup>‡a</sup>, Yue-Ming Yu,<sup>a</sup> Yan-Tuan Li<sup>a,b,\*</sup>, Zhi-Yong Wu<sup>a,\*</sup>, Cui-Wei Yan<sup>a,\*</sup>

<sup>a</sup>*School of Medicine and Pharmacy and College of Marine Life Science, Ocean University of China, Qingdao, Shandong 266003, PR China*

<sup>b</sup>*Laboratory for Marine Drugs and Bioproducts, Qingdao National Laboratory for Marine Science and Technology, 266003, PR China*

\*Correspondence to: Yan-Tuan Li, Zhi-Yong Wu and Cui-Wei Yan.

E-mail addresses: yantuanli@ouc.edu.cn (Yan-Tuan Li), wuzy@ouc.edu.cn (Zhi-Yong Wu), cuiweiyan@ouc.edu.cn (Cui-Wei Yan).

This ESI for *CrystEngComm*, 2021, **23**, 4389-4401, DOI: 10.1039/D1CE00382H, originally published on 4<sup>th</sup> June 2021, was updated on 8<sup>th</sup> June 2023.

## Contents

**Figure S1.** FT-IR spectra of FD, AIN, and the molecular salt.

**Figure S2.** XRPD comparison of simulated pattern for the molecular salt and the residual solids after the powder dissolution measurements.

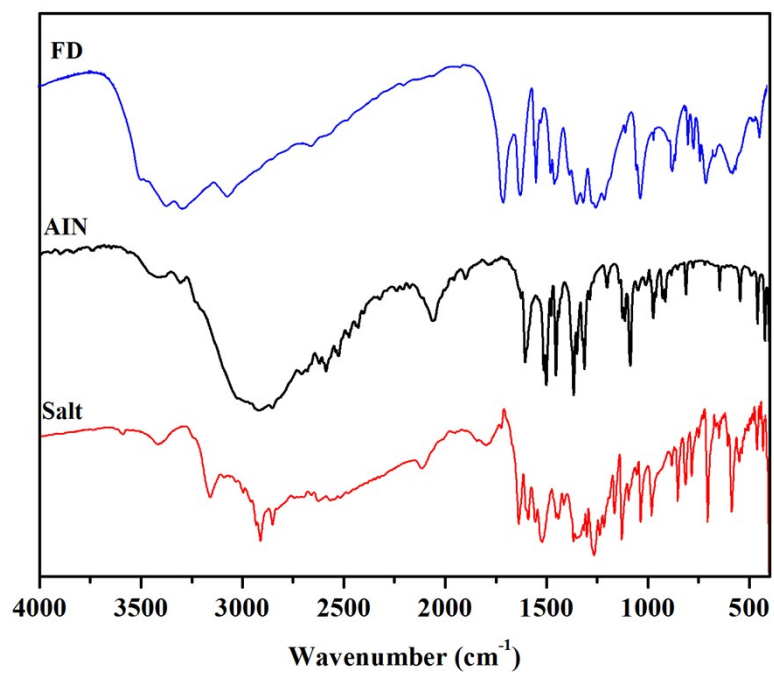

**Figure S1.** FT-IR spectra of FD, AIN, and the molecular salt.

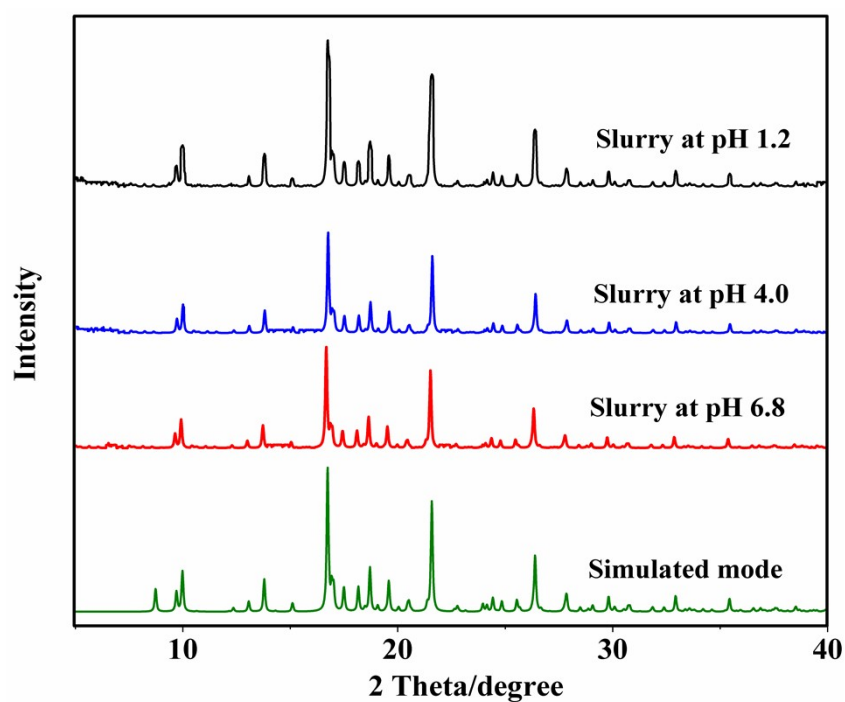

**Figure S2.** XRPD comparison of simulated pattern for the molecular salt and the residual solids after the powder dissolution measurements.
